# Supplementary material for: Wind-generated Rossby waves dynamics and effects on low-frequency Sea Surface Height variability in the South Pacific Ocean
Source: Research Square preprint supplement (doi:10.21203/rs.3.rs-8022684/v1), 2025-11-12
Supplement: Supplementary file 1 [file 0cec1e9fbc0099306e028187.docx]

- The baroclinic mode is less influenced by the bottom topography;
- For wind stress forcings with specific scales, and for moderate seabed slope, the wind energy is mostly transferred to the barotropic mode;
- Non-uniformity of the seabed topography induces dissipation of the energy transferred to the barotropic mode;
- The Qiu empirical term finds its essence in (a) the splitting of the wind energy among baroclinic and barotropic modes, and (b) the dissipation of the barotropic mode energy by seafloor variations.
